# Supplementary material for: A tomato strigolactone-impaired mutant displays aberrant shoot morphology and plant interactions
Source: PubMed Central journal article supplement — J Exp Bot. 2010 Mar 1;61(6):1739–49. doi: 10.1093/jxb/erq041 (PMC2852664; doi:10.1093/jxb/erq041), 2010-03-01
Supplement: erq041_1.pdf [file erq041_1.pdf]

# A tomato strigolactone-impaired mutant displays aberrant shoot morphology and plant interactions

Hinanit Koltai, Sivarama P LekKala, Chaitali Bahattacharya, Einav Mayzlish-Gati, Natalie Resnick, Smadar Wininger, Evgenia Dor, Kaori Yoneyama, Koichi Yoneyama, Joseph Hershenhorn, Daniel M Joel, and Yoram Kapulnik

## Supplementary Material

**Supplementary Figure S1.** Morphological analysis of WT (*Solanum lycopersicon* cv. M82), *Sl-ORT1* and hypocotyl grafted plants, at each of the shoot nodes. WT/WT: WT<sub>scion</sub>-WT<sub>stock</sub>; O/O: *Sl-ORT1*<sub>scion</sub>-*Sl-ORT1*<sub>stock</sub>; O/WT: WT<sub>scion</sub>-*Sl-ORT1*<sub>stock</sub>; WT/O: *Sl-ORT1*<sub>scion</sub>-WT<sub>stock</sub>. In each replicate eight plants were examined for each WT and *Sl-ORT1* strains. The experiment was repeated three times. Means and standard errors are shown.

**Supplementary Figure S2.** Morphological analysis of WT (*Solanum lycopersicon* cv. M82), *Sl-ORT1* and interstock grafted plants, at each of the shoot nodes. WT/WT/WT: WT<sub>scion</sub>-WT<sub>interstock</sub>- WT<sub>stock</sub>; O/O/O: *Sl-ORT1*<sub>scion</sub>- *Sl-ORT1*<sub>interstock</sub>-*Sl-ORT1*<sub>stock</sub>; WT/O/WT: WT<sub>scion</sub>- *Sl-ORT1*<sub>interstock</sub>- WT<sub>stock</sub>; O/WT/O: *Sl-ORT1*<sub>scion</sub>- WT<sub>interstock</sub>-*Sl-ORT1*<sub>stock</sub>. In each replicate eight plants were examined for each WT and *Sl-ORT1* strains. The experiment was repeated three times. Means and standard errors are shown.

**Supplementary Figure S3.** The tomato *CCD8* gene fragment sequence.

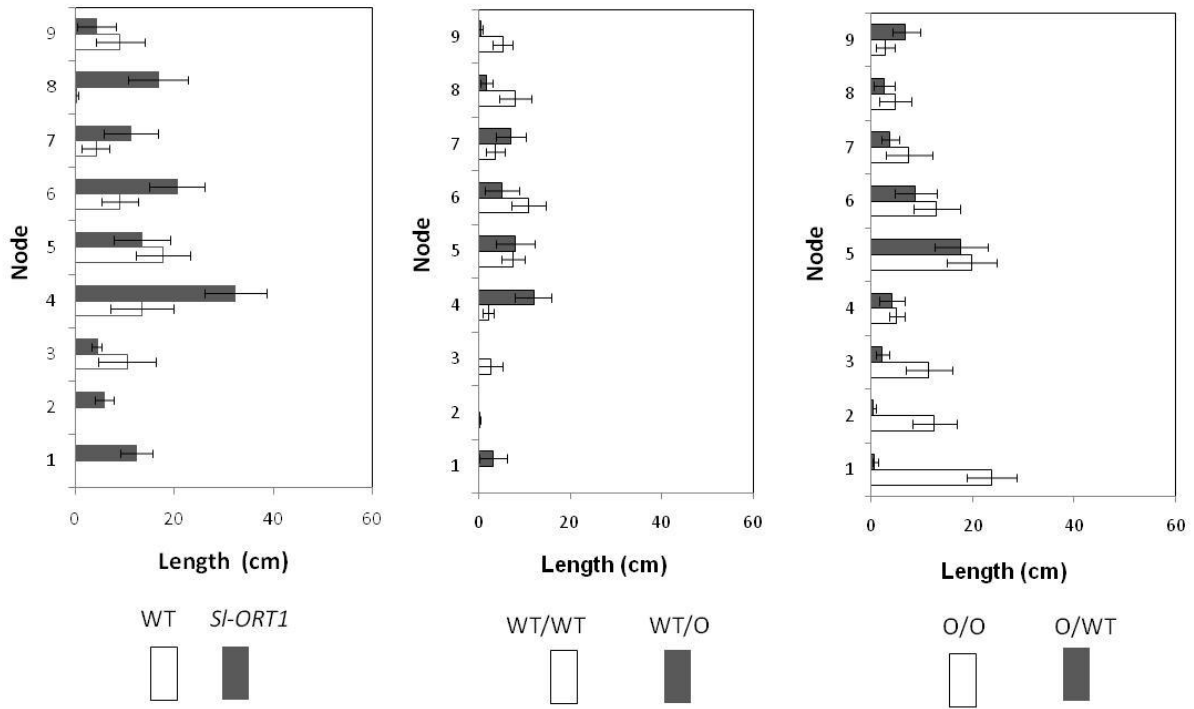

**Supplementary Figure1**

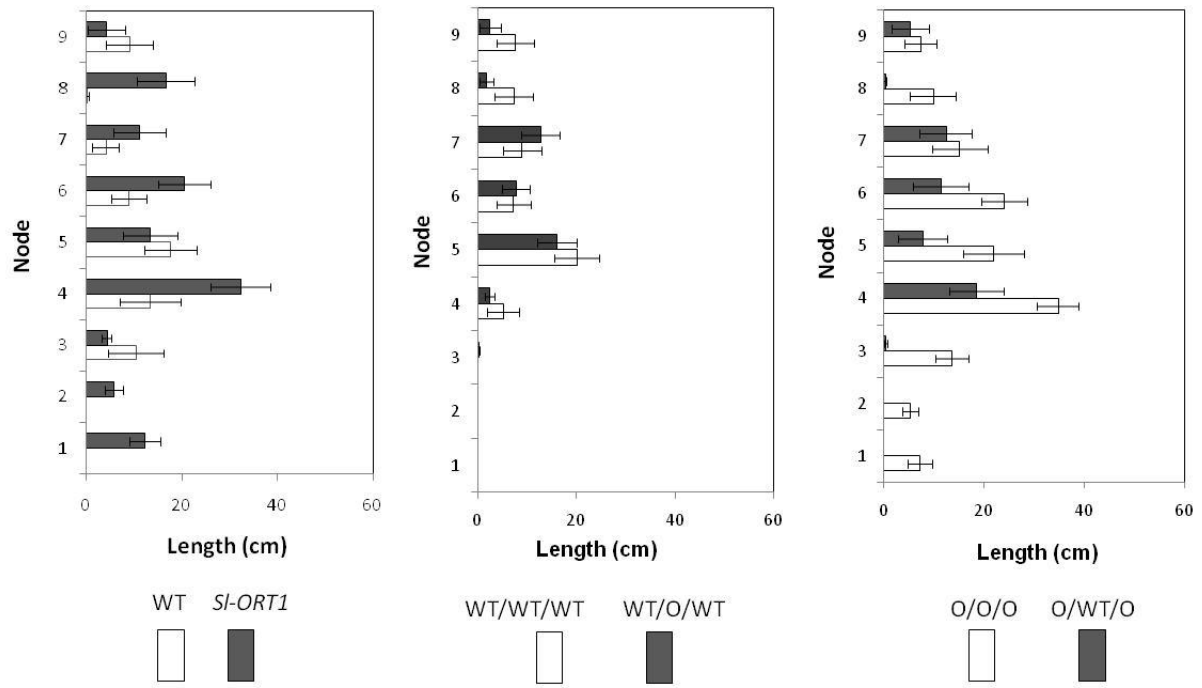

Supplementary Figure2

CAGCAATCTGCAATCACAGCGGTA ACTCTTCCATCTTCGTCTTTNTCTTCG  
TATCCNTTGATGAAGTGGAATGTCACGTA  
TAATGGCACTTCTACACTTGCCACAATGTTGCCACTGGCTNTACACATAAC  
ATGTACAAATGCTTTAGAATCAGGATGCC  
ACTCAA ACTTATACAGTGGTGTGGCTCAGCCTTCAACAAATTTTTNGCAC  
AATACCTTAGTGACATCTCAGGCACAATA  
ACATAATTTTCTGTAACAGGAAATGAATGAACCCATCCTGGTGCTGGTCCT  
CCTCTACA ACTCACTCTCCCTATATACTT  
CCTCTCATTGTCCCTGCCTCCATTCTCACCACCGNATATCCCGGGTTCATT  
AAATCCGGAATCAACGTTATGAACTCAC  
TGTCCGTAACCACTGGATGAGCTGAATGAATCAATCCACCTAACGAGTCA  
CTATATTCAAATTTCCCAATTGTATCTAGG  
GTGTTCCGATCAATTACAATGGAACCTTTTATCGTCTCAGTTAAGCAGACT  
ACGCGTCCATCCCCAAGTTTAACGACTCC  
AGTGTTAGCATTATCGGTTAGGGATGCACCGGAGAGTAATTTTGCCATGTC  
ACCTATGTAGGATAAGAAATTGTCTACTT  
TNGGNACTTCTGAAAATTCTCTGTAACATATTTTCTTACTGATTTTTGCTGC  
TTNATATGCGTCCGATTCNATTTGTCTA

**Supplementary Figure 3:** A fragment of the *Solanum lycopersicon* CCD8 gene
